# Supplementary material for: Ratings of equine conformation – new insights provided by shape analysis using the example of Lipizzan stallions
Source: Copernicus journal article supplement (doi:10.5194/aab-59-309-2016), 2016-06-28
Supplement: Supplementary file 1 [file aab-59-309-2016-supplement.pdf]

Supplement of Arch. Anim. Breed., 59, 309–317, 2016  
<http://www.arch-anim-breed.net/59/309/2016/>  
doi:10.5194/aab-59-309-2016-supplement  
© Author(s) 2016. CC Attribution 3.0 License.

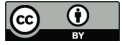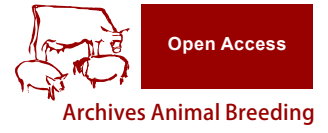

*Supplement of*

## **Ratings of equine conformation – new insights provided by shape analysis using the example of Lipizzan stallions**

**Thomas Druml et al.**

*Correspondence to:* Thomas Druml ([thomas.druml@vetmeduni.ac.at](mailto:thomas.druml@vetmeduni.ac.at))

The copyright of individual parts of the supplement might differ from the CC-BY 3.0 licence.

**Supplementary Table 1** Definitions for the different traits used in the standard scoring protocol of the Austrian Federal stud farm of Piber. Single traits are scored on a scale from 1 to 10 (valuating scoring scale from unfavourable to favourable) by increments of 1 point. (10 = excellent, 9 = very good; 8 = good; 7=satisfactory; 6 = sufficient; 5 not sufficient; 4 = bad; 3 and 2 = very bad; 1 = not shown)

| Trait**       | Definition                                                                                                                                                                                |
|---------------|-------------------------------------------------------------------------------------------------------------------------------------------------------------------------------------------|
| Type          | Expressive expression, noble posture, the overall conformation is harmonious, the frame more rectangular than square. Ideally, the adult horse should measure between 153 cm and 158 cm.  |
| Breed type*   | Similar to type with more emphasis of the Iberian phenotype (curved forehead, long head); Arabian like phenotypes are not desired.                                                        |
| Sex type*     | Clearly expressed sexual dimorphism                                                                                                                                                       |
| Harmony*      | Fore-, mid- and hindquarter should follow the proportion of 1:1:1; the diameter of cannon bones should be in a relation to body size and weight.                                          |
| Head          | The head is expressive with large, black eyes, a wide, slightly curved forehead, finely modelled lower jaw, strong cheeks with sufficient freedom, straight or slightly convex nose line. |
| Neck          | In keeping with the requirements of the Baroque, the strong and highly set neck has an arched main line and erect posture.                                                                |
| Shoulder      | The shoulders are strong and sufficiently long and should be set at an angle between 50° and 65° to the proportionately long upper arm.                                                   |
| Chest         | The chest should be deep and wide.                                                                                                                                                        |
| Withers       | moderate high and long withers                                                                                                                                                            |
| Back          | The back is wide, muscular and compact, the haunches are strong.                                                                                                                          |
| Croup         | The croup should be round, strong and have a harmonious set tail.                                                                                                                         |
| Legs          | The horse should have relatively short, strong, dry legs with clear tendons, strong joints and hard, correctly formed hooves.                                                             |
| Overall score | Mean of Type, breed type, sex type, harmony, head, neck, withers, shoulder, chest, back, croup, legs                                                                                      |

\* sub-traits included for scientific purpose

\*\* Complete scoring protocol also includes stance, walk and trot
